# Supplementary material for: Protonation, electrochemical properties and molecular structures of halogen-functionalized diiron azadithiolate complexes related to the active site of iron-only hydrogenases
Source: Royal Society of Chemistry journal article supplement (doi:10.1039/b706178a), 2007-01-01
Supplement: b706178a.pdf [file b706178a.pdf]

## Protonation, electrochemical properties and molecular structures of halogen-functionalized diiron azadithiolate complexes related to the active site of iron-only hydrogenases

Fujun Wang,<sup>a</sup> Mei Wang,<sup>\*a</sup> Xiaoyang Liu,<sup>b</sup> Kun Jin,<sup>a</sup> Weibing Dong,<sup>a</sup> Licheng Sun<sup>\*a,c</sup>

<sup>a</sup> State Key Laboratory of Fine Chemicals, DUT-KTH Joint Education and Research Center on Molecular Devices, Dalian University of Technology (DUT), Dalian 116012 China

<sup>b</sup> State Key Laboratory of Inorganic Synthesis and Preparative Chemistry, Jilin University, Changchun 130012, China

<sup>c</sup> Department of Chemistry, Royal Institute of Technology (KTH), 10044, Stockholm, Sweden

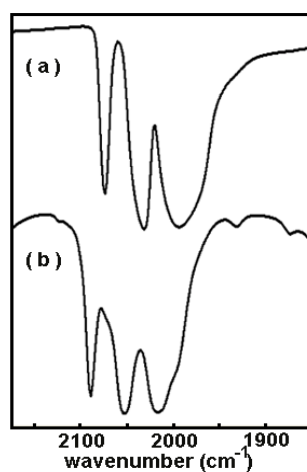

Fig. S1 The IR spectra of (a) **3** in CH<sub>3</sub>CN, (b) + 10 equiv of HClO<sub>4</sub>.

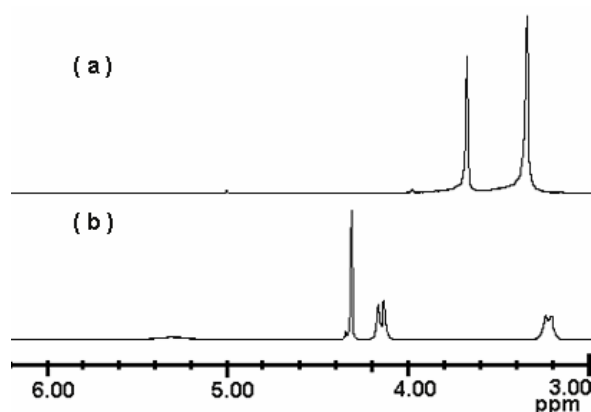

Fig. S2 The <sup>1</sup>H NMR spectra of (a) **3** in CD<sub>3</sub>CN, (b) [3(NH)]<sup>+</sup> in CD<sub>3</sub>CN.

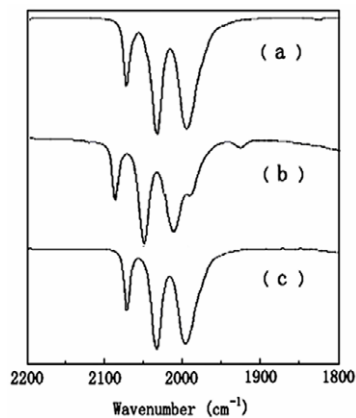

**Fig. S3** IR spectra of (a) **1** in CH<sub>3</sub>CN, (b) + 10 equiv of HClO<sub>4</sub>, (c) [1(NH)]<sup>+</sup> + 1 equiv of 4-bromoaniline in CH<sub>3</sub>CN.

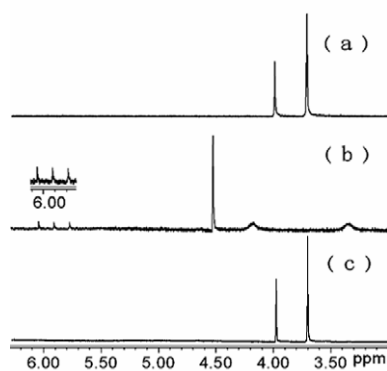

**Fig. S4** <sup>1</sup>H NMR spectra of (a) **1** in CD<sub>3</sub>CN, (b) [1(NH)]<sup>+</sup> in CD<sub>3</sub>CN, (c) [1(NH)]<sup>+</sup> + 1 equiv of 4-bromoaniline in CD<sub>3</sub>CN.

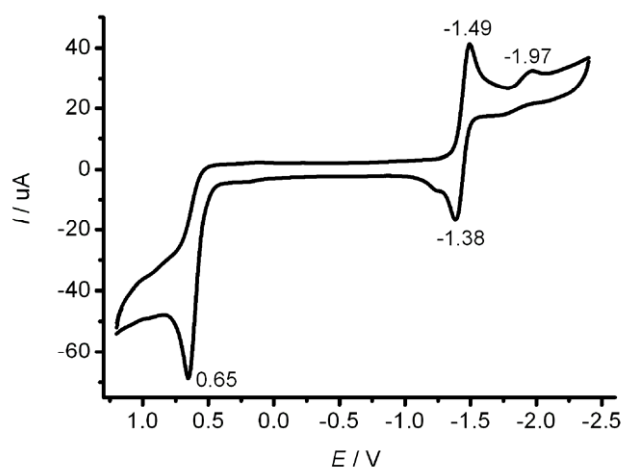

**Fig. S5** The CV of complex **1**, 0.1 M  $n\text{Bu}_4\text{NPF}_6$  in  $\text{CH}_3\text{CN}$ , scan rate  $100 \text{ mV s}^{-1}$ , using a non-aqueous  $\text{Ag}/\text{AgNO}_3$  electrode as reference.

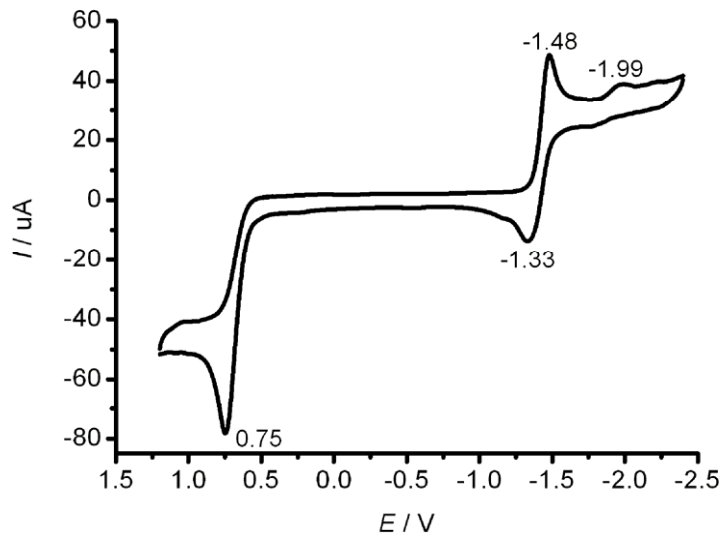

**Fig. S6** The CV of complex **2**, 0.1 M  $n\text{Bu}_4\text{NPF}_6$  in  $\text{CH}_3\text{CN}$ , scan rate  $100 \text{ mV s}^{-1}$ , using a non-aqueous  $\text{Ag}/\text{AgNO}_3$  electrode as reference.

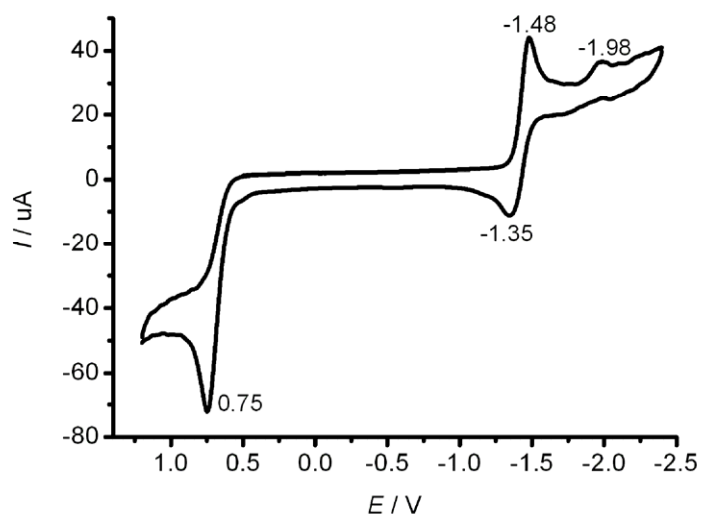

**Fig. S7** The CV of complex **3**, 0.1 M  $n\text{Bu}_4\text{NPF}_6$  in  $\text{CH}_3\text{CN}$ ; scan rate  $100 \text{ mV s}^{-1}$ , using a non-aqueous  $\text{Ag}/\text{AgNO}_3$  electrode as reference.

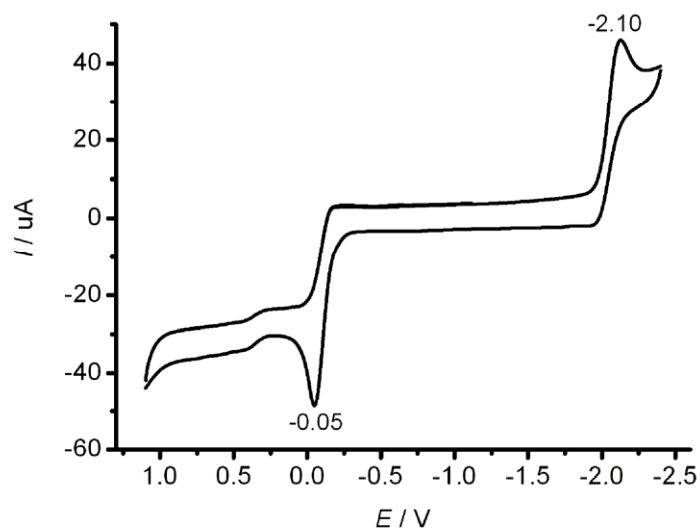

**Fig. S8** The CV of complex **4**, 0.1 M  $n\text{Bu}_4\text{NPF}_6$  in  $\text{CH}_3\text{CN}$ , scan rate  $100 \text{ mV s}^{-1}$ , using a non-aqueous  $\text{Ag}/\text{AgNO}_3$  electrode as reference.

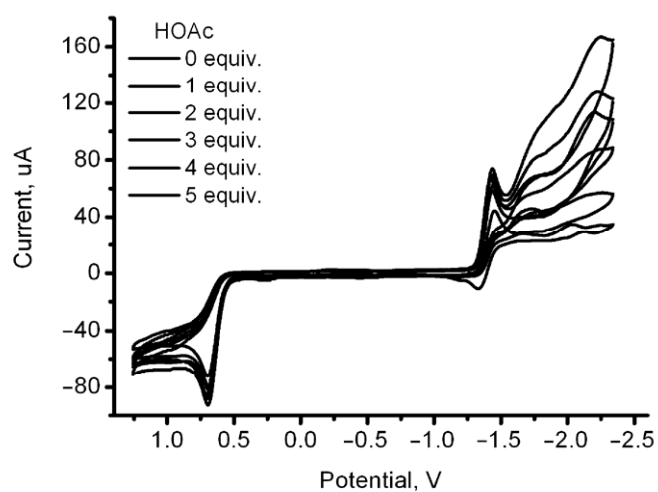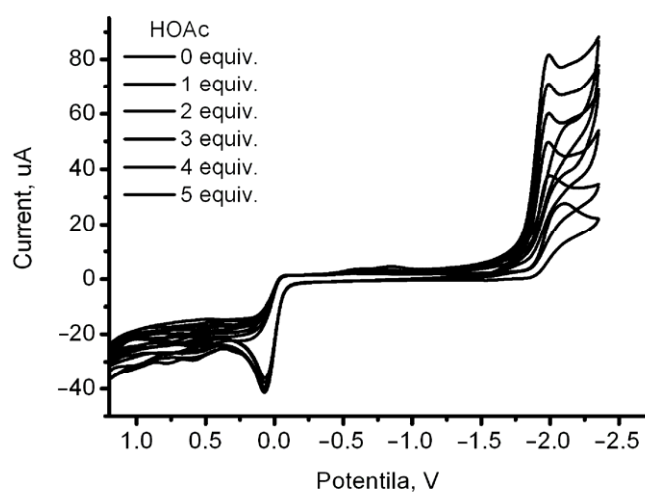

**Fig. S9** Cyclic voltammograms of (top) **1** + HOAc in CH<sub>3</sub>CN, (bottom) **4** + HOAc in CH<sub>3</sub>CN, with 1.0 mM complex in 0.05 M *n*Bu<sub>4</sub>NPF<sub>6</sub>/CH<sub>3</sub>CN at a scan rate of 100 mV s<sup>-1</sup>.

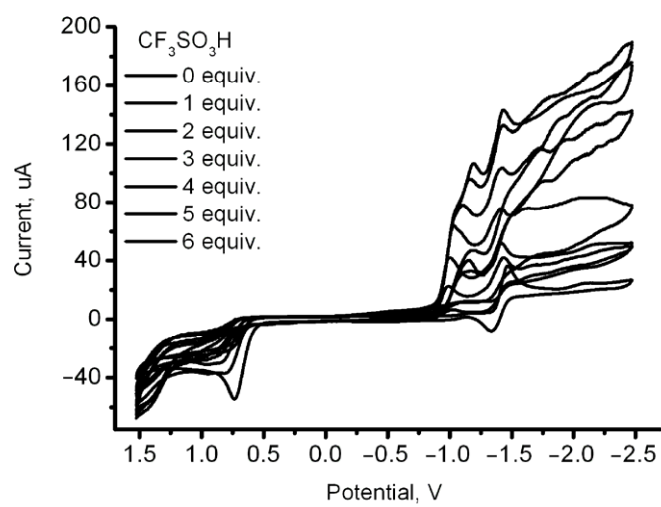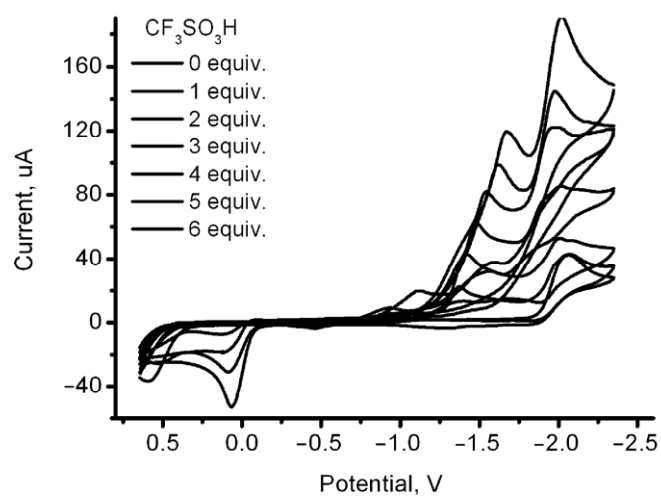

**Fig. S10** Cyclic voltammograms of (top) **1** + HOTf in CH<sub>3</sub>CN, (bottom) **4** + HOTf in CH<sub>3</sub>CN, with 1.0 mM complex in 0.05 M *n*Bu<sub>4</sub>NPF<sub>6</sub>/CH<sub>3</sub>CN at a scan rate of 100 mV s<sup>-1</sup>.
